# Supplementary material for: Accountability: Iowa Style.
Source: MDPI journal article supplement (doi:10.3390/ani13071236), 1975-01-01
Supplement: s1 [file s1]

**Table S3.** Summary of trimming and read mapping results of the sequences generated from DSS-treated mice

| Sample   | Raw reads | Clean reads | Q30 (%) | GC content (%) | Total mapped     | Multiple mapped | Unique mapped    |
|----------|-----------|-------------|---------|----------------|------------------|-----------------|------------------|
| DSS-KO-1 | 52080674  | 51531546    | 93.42   | 49.72          | 49858181(96.75%) | 4509170(8.75%)  | 45349011(88.0%)  |
| DSS-KO-2 | 46377730  | 45930040    | 93.29   | 49.8           | 42513831(92.56%) | 3736299(8.13%)  | 38777532(84.43%) |
| DSS-KO-3 | 53050710  | 52481006    | 93.43   | 49.55          | 50763306(96.73%) | 5186260(9.88%)  | 45577046(86.84%) |
| DSS-KO-4 | 47379846  | 46869908    | 93.43   | 48.69          | 45076582(96.17%) | 5264493(11.23%) | 39812089(84.94%) |
| DSS-WT-1 | 52031128  | 51522142    | 93.63   | 49.64          | 49750406(96.56%) | 4919033(9.55%)  | 44831373(87.01%) |
| DSS-WT-2 | 53668680  | 53147182    | 93.6    | 50.08          | 51461477(96.83%) | 4583893(8.62%)  | 46877584(88.2%)  |
| DSS-WT-3 | 48003972  | 47512952    | 93.44   | 49.69          | 45910219(96.63%) | 4366966(9.19%)  | 41543253(87.44%) |
| DSS-WT-4 | 51247716  | 50687948    | 93.34   | 50.27          | 48875594(96.42%) | 4263531(8.41%)  | 44612063(88.01%) |
