# Supplementary material for: Accountability: Iowa Style.
Source: MDPI journal article supplement (doi:10.3390/ani13071236), 1975-01-01
Supplement: s1 [file s1]

**Table S2.** Histological scoring system for mice with colitis

| Score | inflammatory cells infiltration                               | cecal tissue damage                                                                |
|-------|---------------------------------------------------------------|------------------------------------------------------------------------------------|
| 0     | normal                                                        | normal                                                                             |
| 1     | scattered inflammatory cells in the lamina propria            | minimal inflammation and crypt hyperplasia                                         |
| 2     | increased numbers of inflammatory cells in the lamina propria | mild crypt hyperplasia                                                             |
| 3     | confluence of inflammatory cells extending into the submucosa | obvious crypt hyperplasia, invasion of epithelium                                  |
| 4     | transmural extension of the infiltrative inflammatory cells   | extensive mucosal damage and extension through deeper structures of the bowel wall |
