# Supplementary material for: Accountability: Iowa Style.
Source: MDPI journal article supplement (doi:10.3390/ani13071236), 1975-01-01
Supplement: s1 [file s1]

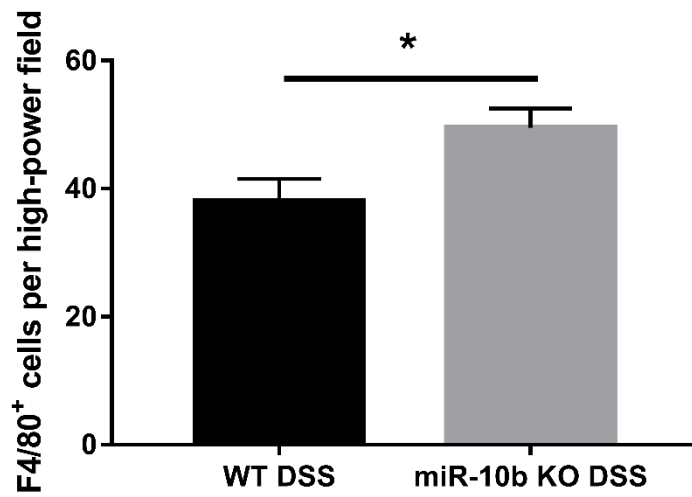

**Supplementary Figure S1.** Number of F4/80<sup>+</sup> macrophages in colonic tissue. The mean number of F4/80<sup>+</sup> cells detected in each high-power field was calculated by counting four fields from each sample (samples from three mice per group were counted) (WT, wild-type; KO, knockout; n = 12/group; \*,  $P < 0.05$ ).
