# Supplementary material for: Accountability: Iowa Style.
Source: MDPI journal article supplement (doi:10.3390/ani13071236), 1975-01-01
Supplement: s1 [file s1]

**Table S1.** Disease activity index (DAI) scoring system for mice with colitis

| Score | Body weight loss | Fecal hardness | Bleeding scores |
|-------|------------------|----------------|-----------------|
| 0     | none             | normal         | none            |
| 1     | 1-5%             |                |                 |
| 2     | 6-10%            | loose          | slight bleeding |
| 3     | 11-20%           |                |                 |
| 4     | >20%             | diarrhea       | gross bleeding  |
