# Supplementary material for: Investigation of the Expression Pattern and Functional Role of miR-10b in Intestinal Inflammation
Source: Animals (Basel). 2023 Apr 2;13(7):1236. doi: 10.3390/ani13071236 (PMC10093392; doi:10.3390/ani13071236)
Supplement: Supplementary file 1 [file animals-13-01236-s001.zip]

Archive with 4 entries (4 files):
- Supplementary Figure S1.pdf
- Supplementary Table S1-DAI.pdf
- Supplementary Table S2.pdf
- Supplementary Table S3.pdf
